# Supplementary material for: Studies on the optical stability of CsPbBr3 with different dimensions (0D, 1D, 2D, 3D) under thermal environments
Source: Royal Society of Chemistry journal article supplement (doi:10.1039/d3nr01863f), 2023-01-01
Supplement: d3nr01863f1.pdf [file d3nr01863f1.pdf]

## Supporting information

### Study on the optical stability of CsPbBr<sub>3</sub> with different dimensions (0D, 1D, 2D, 3D) under thermal environment

Jindou Shi<sup>1</sup>, Minqiang Wang\*<sup>1</sup>, Zheyuan Da<sup>1</sup>, Chen Zhang<sup>1</sup>, Junnan Wang<sup>1</sup>, Yusong Ding<sup>1</sup>,  
Youlong Xu\*<sup>1</sup> and Nikolai V. Gaponenko<sup>2</sup>

<sup>1</sup>Electronic Materials Research Laboratory, Key Laboratory of the Ministry of Education International Center for Dielectric Research&Shannxi Engineering Research Center of Advanced Energy Materials and Devices, Xi'an Jiaotong University, 710049 Xi'an, China.

<sup>2</sup>Belarusian State University of Informatics and Radioelectronics, P. Browki 6, 220013 Minsk, Belarus.

Corresponding Author: E-mail: mqwang@xjtu.edu.cn

## Experimental Section

### Materials

The cesium carbonate ( $\text{Cs}_2\text{CO}_3$ , 99.99%), lead (II) bromide ( $\text{PbBr}_2$ , 99.99%), oleic acid (OA, 85%), oleylamine (OAm, 80-90%), 1-octadecene (ODE, 90%), hexane ( $\text{C}_6\text{H}_{12}$ , 99.5%) were purchased from Aladdin. All the reagents were used without further purification.

### Preparation of $\text{CsPbBr}_3$ with different dimensions (0D, 1D, 2D and 3D).

In this report, the traditional high temperature thermal injection method was employed to prepare  $\text{CsPbBr}_3$  fluorescent materials. Subsequently, the conversion between the different dimensions (0D, 1D, 2D, 3D) of  $\text{CsPbBr}_3$  was achieved by adjusting the ratio of the precursor solution, and controlling the time as well as the temperature of the high temperature reaction. Both Cs and Pb precursors were dried under vacuum at 120 °C for 30 mins, after which the precursors were heated to 140 °C in a nitrogen atmosphere to ensure complete dissolution. Finally, thermal injection operation was carried out under different reaction conditions. The crude product after the reaction was washed several times with  $\text{C}_6\text{H}_{12}$ , and dispersed in  $\text{C}_6\text{H}_{12}$  for storage. The specific preparation parameters listed in the table below.

| Dimensions | Cs precursor                    | Pb precursor          | Reaction temperature | Injection amount of Cs precursor | Reaction time |
|------------|---------------------------------|-----------------------|----------------------|----------------------------------|---------------|
| 0D         | 160 mg $\text{Cs}_2\text{CO}_3$ | 69 mg $\text{PbBr}_2$ | 150 °C               | 0.4 mL                           | 5 s           |
|            | 6 mL ODE                        | 5 mL ODE              |                      |                                  |               |
|            | 0.5 mL OA                       | 0.5 mL OA             |                      |                                  |               |
|            | 0.5 mL OAm                      | 0.5 mL OAm            |                      |                                  |               |
| 1D         | 200 mg $\text{Cs}_2\text{CO}_3$ | 66 mg $\text{PbBr}_2$ | 150 °C               | 0.6 mL                           | 50 mins       |
|            | 7.5 mL ODE                      | 5 mL ODE              |                      |                                  |               |
|            | 0.6 mL OA                       | 0.4 mL OA             |                      |                                  |               |
| 2D         | 32 mg $\text{Cs}_2\text{CO}_3$  | 13 mg $\text{PbBr}_2$ | 150 °C               | 1 mL                             | 5 mins        |
|            | 10 mL OA                        | 10 mL ODE             |                      |                                  |               |
|            |                                 | 0.25 mL OA            |                      |                                  |               |
|            |                                 | 0.25 mL OAm           |                      |                                  |               |

|    |                                                                    |                                                                |        |        |         |
|----|--------------------------------------------------------------------|----------------------------------------------------------------|--------|--------|---------|
| 3D | 160 mg<br>Cs <sub>2</sub> CO <sub>3</sub><br>6 mL ODE<br>0.5 mL OA | 69 mg PbBr <sub>2</sub><br>5 mL ODE<br>0.5 mL OA<br>0.5 mL OAm | 100 °C | 0.5 mL | 30 mins |
|----|--------------------------------------------------------------------|----------------------------------------------------------------|--------|--------|---------|

---

### *Characterization Methods*

The morphology and microstructure of the as-synthesized CsPbBr<sub>3</sub> with different dimensions (0D, 1D, 2D and 3D) were analyzed using a high-resolution TEM (JEOL JEM-F200). EDS spectra of powder samples were investigated by field emission scanning electron microscopy (SEM, FEI Quatan FEG 250) equipped with an energy dispersive spectrometer (EDS). The photoluminescence (PL) spectra, PL quantum yields (PLQYs) was recorded on an Edinburgh Instruments FLS 1000 spectrometer. The time-resolved PL (TRPL) decay curves were recorded on an Edinburgh Instruments FLS 1000 spectrometer by using a quartz glass tool to fix different powder samples respectively. The ultraviolet-visible (UV-Vis) absorption spectra were recorded by PE Lambda 950. The X-ray diffraction (XRD) patterns were obtained using the DB-ADVANCE X-ray diffraction analyzer diffractometer. The PL spectra of the samples at different temperatures were collected by Photo Research 670 spectrometer after heating the samples using a heater (MS7-H550-S, DLAB, China) and under 365 nm UV light irradiation.

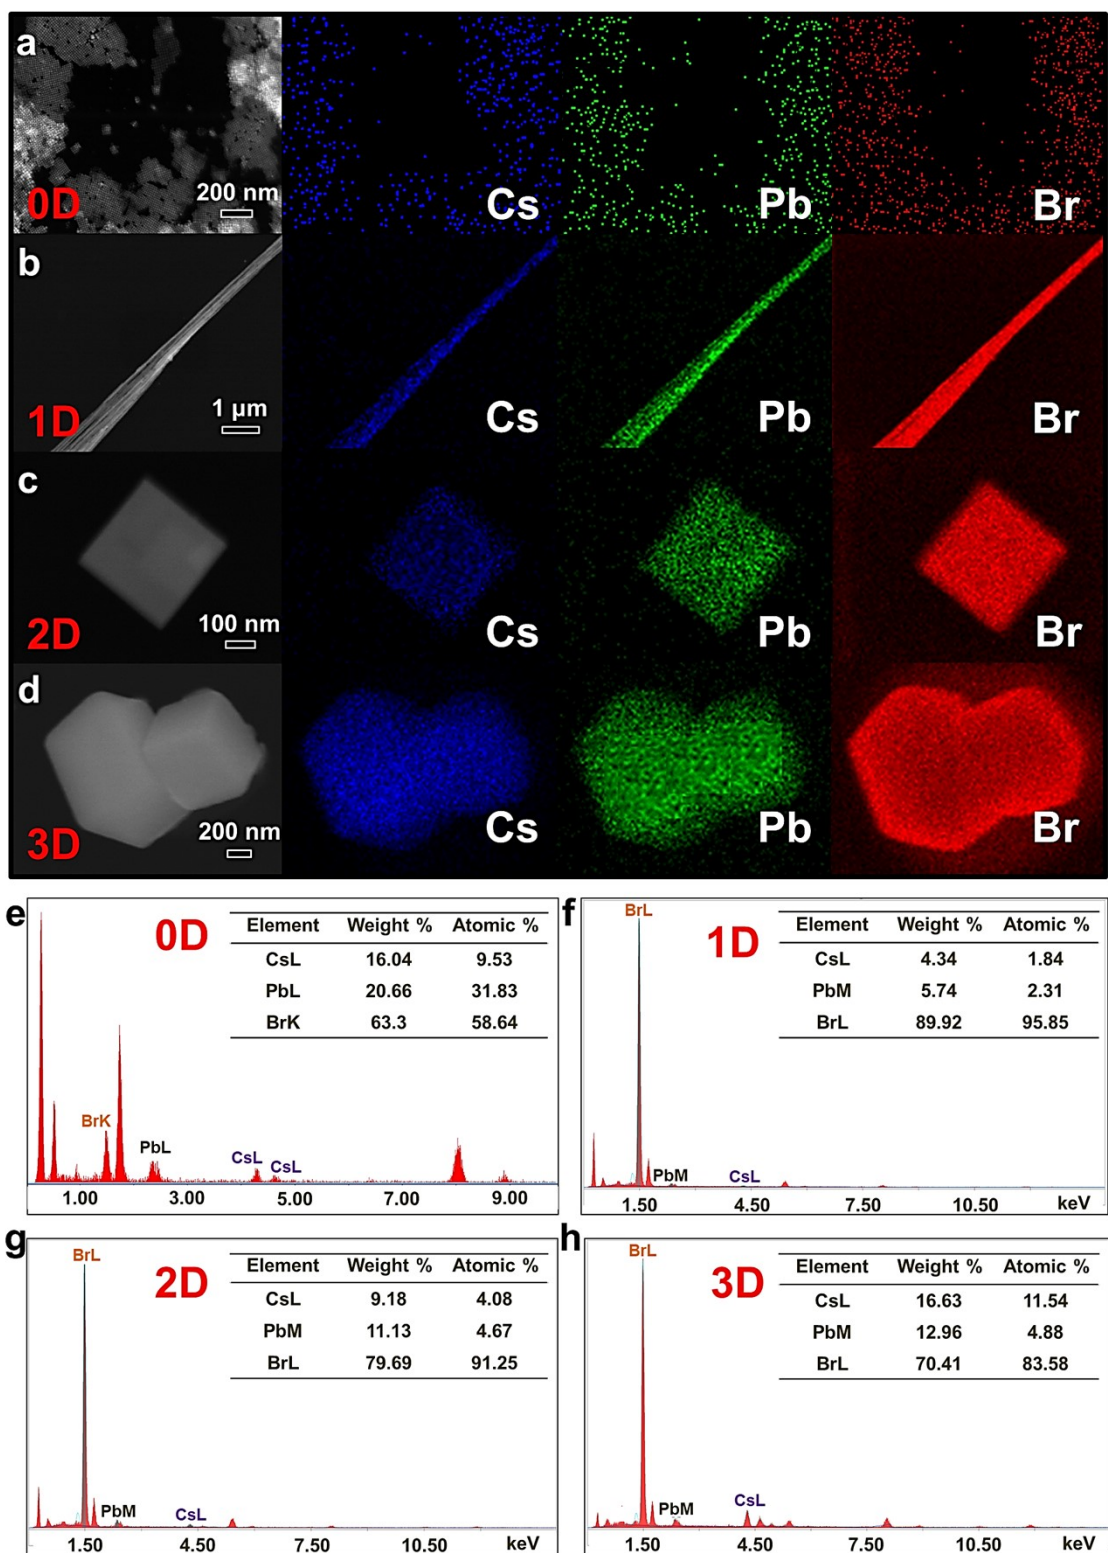

**Fig. S1** TEM images of 0D CsPbBr<sub>3</sub> QDs (a), SEM images of 1D CsPbBr<sub>3</sub> NWs (b), 2D CsPbBr<sub>3</sub> NPs (c) and 3D CsPbBr<sub>3</sub> MCs (d), with corresponding EDS mapping and spectra (e-h) of Cs (blue), Pb (green) and Br (red), respectively.

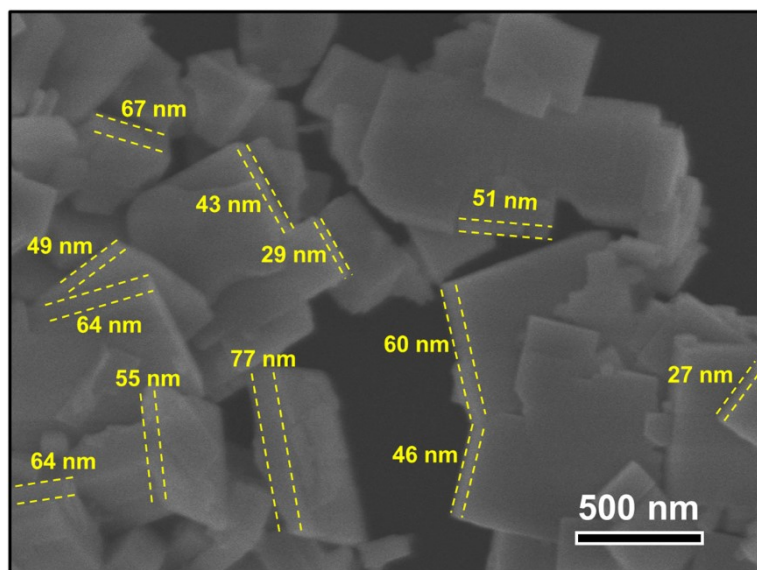

**Fig. S2** Thickness count of 2D CsPbBr<sub>3</sub> NPs.

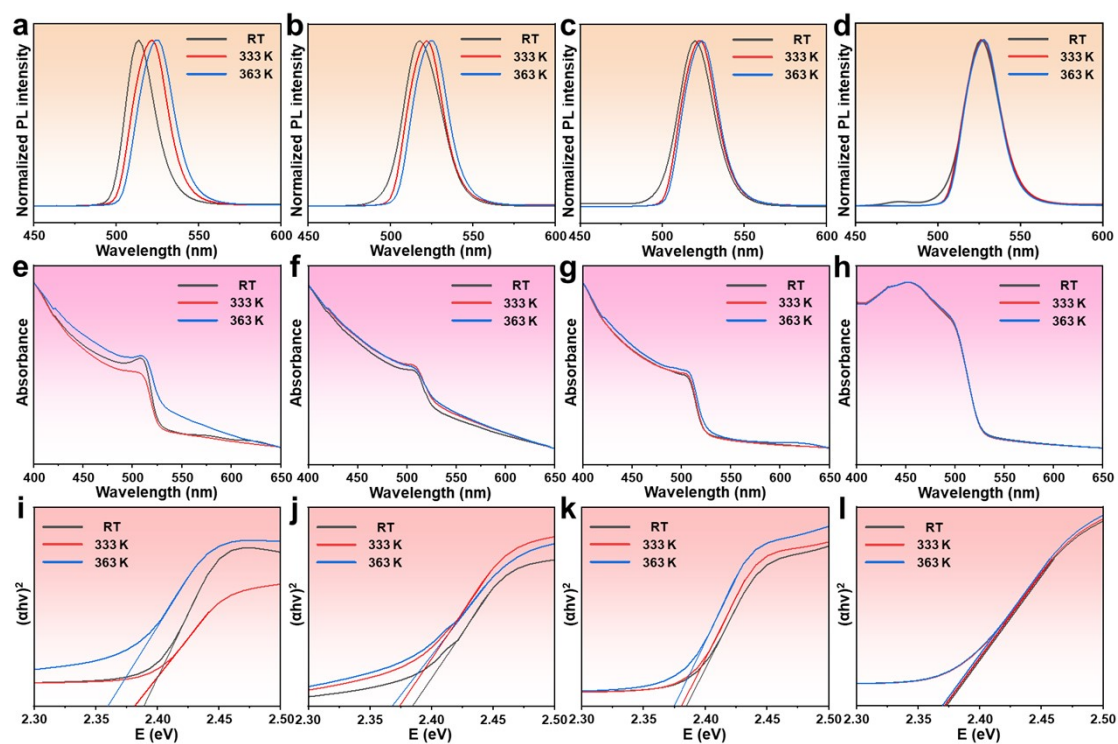

**Fig. S3** Normalized PL spectra (a-d), absorption spectra (e-h) and corresponding  $(\alpha h\nu)^2$  vs photon energy (eV) curves (i-l) of 0D CsPbBr<sub>3</sub> QDs, 1D CsPbBr<sub>3</sub> NWs, 2D CsPbBr<sub>3</sub> NPs and 3D CsPbBr<sub>3</sub> MCs after annealing at 333 K and 373 K for 20 mins.

**Table. S1.** Double exponential fitting results of PL decays for CsPbBr<sub>3</sub> with different dimensions (0D, 1D, 2D and 3D)

| Dimension | $\tau_1$ (ns) | A <sub>1</sub> (%) | $\tau_2$ (ns) | A <sub>2</sub> (%) | $\tau_{ave}$ (ns) |
|-----------|---------------|--------------------|---------------|--------------------|-------------------|
| 0D        | 5.21          | 38.5               | 27.71         | 61.5               | 25.34             |
| 1D        | 5.78          | 41.3               | 25.73         | 58.7               | 23.01             |
| 2D        | 4.12          | 46.1               | 22.71         | 53.9               | 20.21             |
| 3D        | 3.2           | 57.2               | 15.92         | 42.8               | 13.23             |

**Table. S2.** Double exponential fitting results of PL decays for CsPbBr<sub>3</sub> with different dimensions (0D, 1D, 2D and 3D) after annealing at 373K for 20 mins

| Dimension | $\tau_1$ (ns) | A <sub>1</sub> (%) | $\tau_2$ (ns) | A <sub>2</sub> (%) | $\tau_{ave}$ (ns) |
|-----------|---------------|--------------------|---------------|--------------------|-------------------|
| 0D        | 2.32          | 70.9               | 9.00          | 29.1               | 6.42              |
| 1D        | 2.38          | 66.9               | 9.71          | 33.1               | 7.28              |
| 2D        | 2.95          | 62.7               | 13.76         | 37.3               | 10.9              |
| 3D        | 2.13          | 60.7               | 15.16         | 39.3               | 12.84             |

The PL decay curves of different samples were studied and the decay traces for the samples were well fitted with double exponential function  $Y(t)$  based on nonlinear least-squares, using the following expression.

$$Y(t) = A_1 \exp(-t/\tau_1) + A_2 \exp(-t/\tau_2)$$

where  $A_1$ ,  $A_2$  are fractional contributions of time-resolved emission decay lifetimes  $\tau_1$ ,  $\tau_2$ .

The average lifetime ( $\tau_{ave}$ ) of the different samples can be obtained by the following equation.

$$\tau_{ave} = \frac{A_1 \tau_1^2 + A_2 \tau_2^2}{A_1 \tau_1 + A_2 \tau_2}$$
